# Supplementary material for: Assessment of Different Niosome Formulations for Optogenetic Applications: Morphological and Electrophysiological Effects
Source: MDPI journal article supplement (doi:10.3390/pharmaceutics15071860), 2023-07-01
Supplement: s1 [file s1]

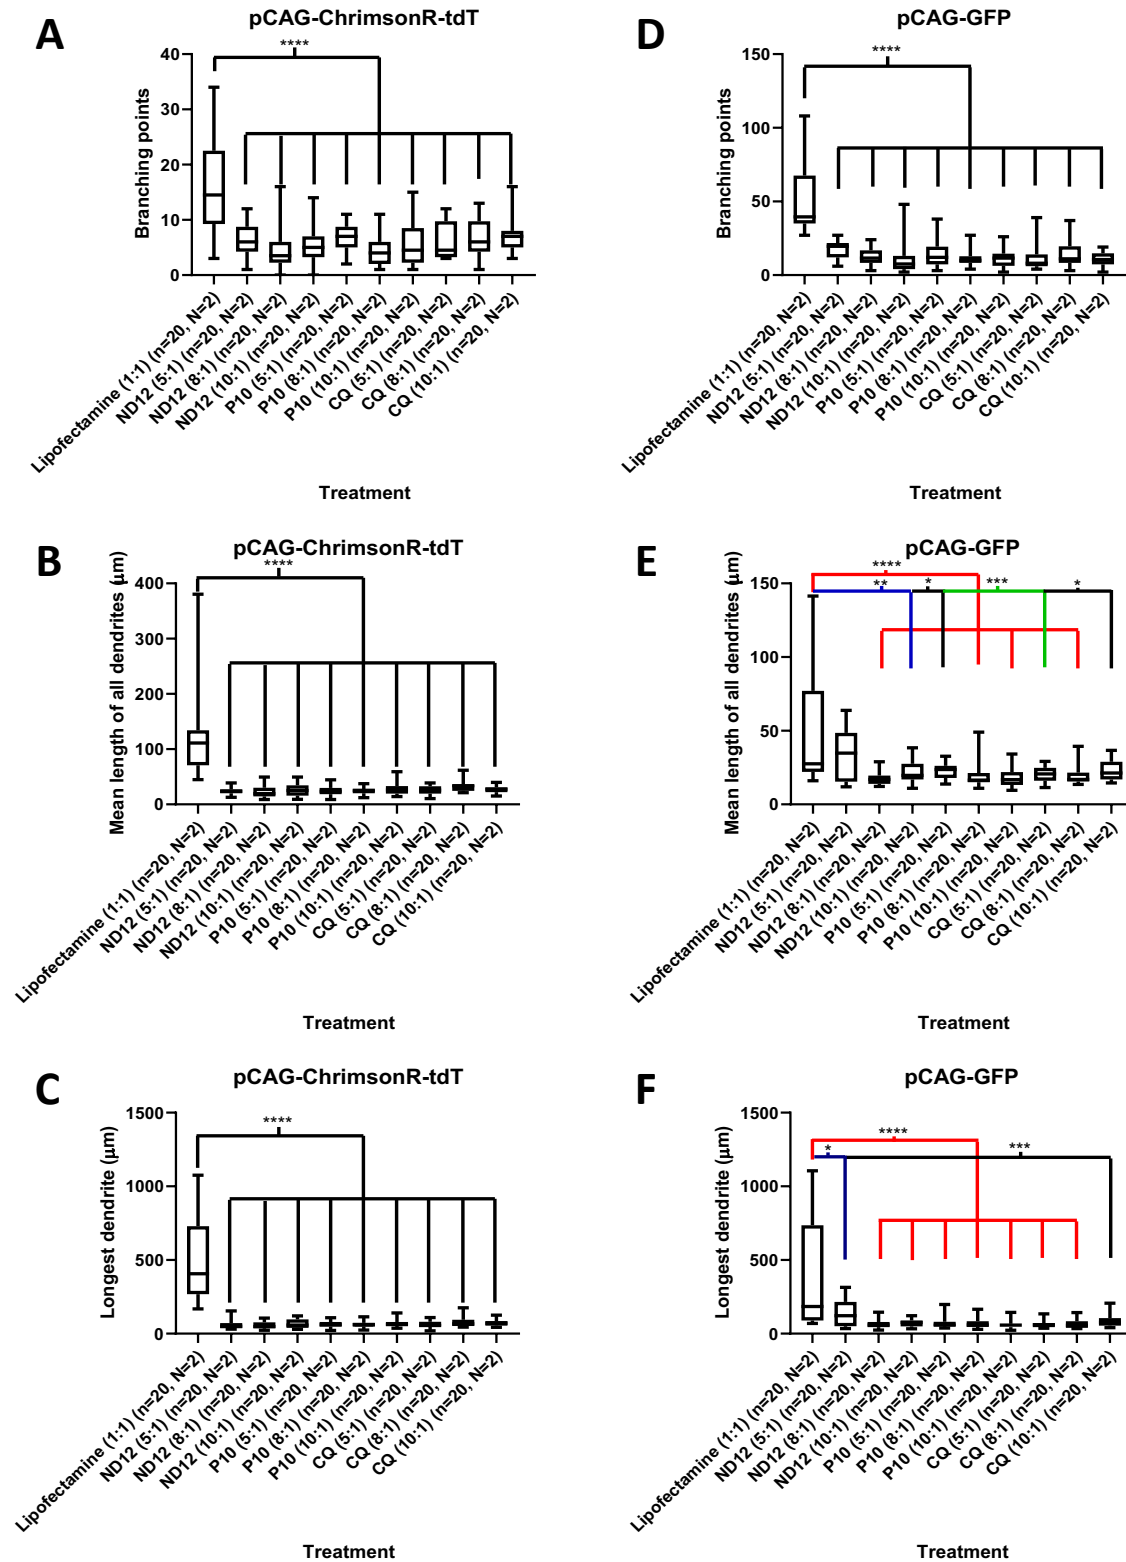

**Supplementary Figure S1. Additional morphological parameters in neurons treated with nioplexes made of pCAG-ChrimsonR-tdTomato and pCAG-GFP.** 21-28 DIV rat cortical neurons treated with nioplexes made of pCAG-ChrimsonR-tdTomato plus niosomes showed reduction in the morphological parameters branching points (A), mean length of all dendrites (B), and longest dendrite (C) compared with the lipofectamine treatment, with similar outcome in neurons treated with nioplexes made of pCAG-GFP plus niosomes (D-F) (Mann-Whitney test, \* $P < 0.05$ , \*\* $P < 0.01$ , \*\*\* $P < 0.001$ , \*\*\*\* $P < 0.0001$ ,  $n$  = number of cells,  $N$  = number of cultures).

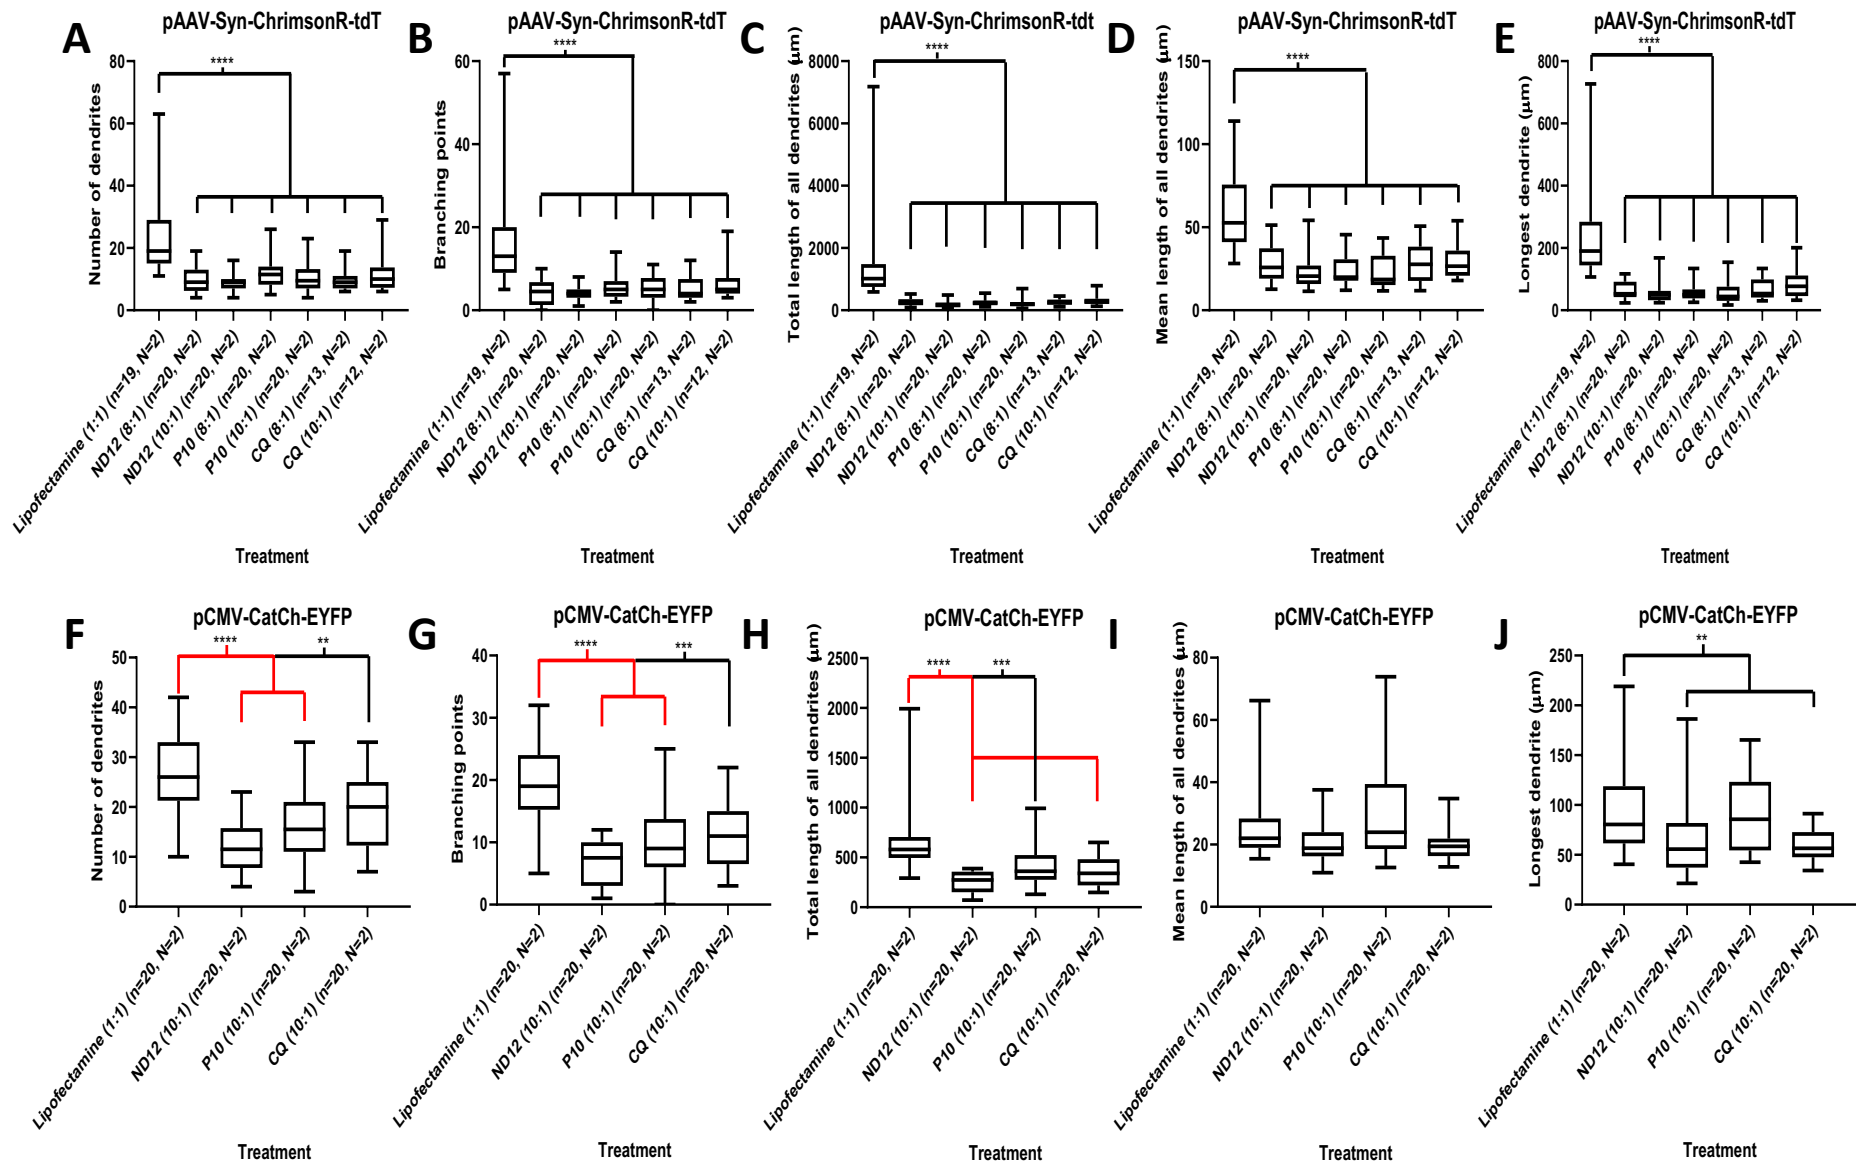

**Supplementary Figure S2. Morphological parameters in neurons treated with nioplexes made of pAAV-Syn-ChrimsonR-tdTomato and pCMV-CatCh-EYFP.** 21-28 DIV rat cortical neurons treated with nioplexes made of pAAV-Syn-ChrimsonR-tdTomato plus niosomes showed reduction in morphological parameters number of dendrites (A), branching points (B), total length of all dendrites (C), mean length of all dendrites (D) and longest dendrite (E) compared with the lipofectamine treatment, with similar outcome in pCMV-CatCh-EYFP in most parameters (F, G, H, J), except in mean length of all dendrites (I) (Mann-Whitney test, \*\*P<0.01, \*\*\*P<0.001, \*\*\*\*P<0.0001, n = number of cells, N = number of cultures).

| Nioplexes<br>21-28 DIV neurons         | Number of dendrites                              | Branching points                                 | Total length of all<br>dendrites                 | Mean length of all<br>dendrites                  | Longest dendrite                                 |
|----------------------------------------|--------------------------------------------------|--------------------------------------------------|--------------------------------------------------|--------------------------------------------------|--------------------------------------------------|
|                                        | CAG-ChrimsonR/Lipofectamine<br>(1:1) (n=20, N=2) |
| CAG-ChrimsonR/ND12 (5:1) (n=20, N=2)   | p<0.0001****                                     | p<0.0001****                                     | p<0.0001****                                     | p<0.0001****                                     | p<0.0001****                                     |
| CAG-ChrimsonR/ND12 (8:1) (n=20, N=2)   | p<0.0001****                                     | p<0.0001****                                     | p<0.0001****                                     | p<0.0001****                                     | p<0.0001****                                     |
| CAG-ChrimsonR/ND12 (10:1) (n=20, N=2)  | p=0.0002***                                      | p<0.0001****                                     | p<0.0001****                                     | p<0.0001****                                     | p<0.0001****                                     |
| CAG-ChrimsonR/P10 (5:1) (n=20, N=2)    | p=0.0001***                                      | p<0.0001****                                     | p<0.0001****                                     | p<0.0001****                                     | p<0.0001****                                     |
| CAG-ChrimsonR/P10 (8:1) (n=20, N=2)    | p<0.0001****                                     | p<0.0001****                                     | p<0.0001****                                     | p<0.0001****                                     | p<0.0001****                                     |
| CAG-ChrimsonR/P10 (10:1) (n=20, N=2)   | p<0.0001****                                     | p<0.0001****                                     | p<0.0001****                                     | p<0.0001****                                     | p<0.0001****                                     |
| CAG-ChrimsonR/CQ (5:1) (n=20, N=2)     | p<0.0001****                                     | p<0.0001****                                     | p<0.0001****                                     | p<0.0001****                                     | p<0.0001****                                     |
| CAG-ChrimsonR/CQ (8:1) (n=20, N=2)     | p<0.0001****                                     | p<0.0001****                                     | p<0.0001****                                     | p<0.0001****                                     | p<0.0001****                                     |
| CAG-ChrimsonR/CQ (10:1) (n=20, N=2)    | p=0.0001***                                      | p<0.0001****                                     | p<0.0001****                                     | p<0.0001****                                     | p<0.0001****                                     |
|                                        | CatCh/Lipofectamine (1:1) (n=20,<br>N=2)         |
| CatCh /ND12 (10:1) (n=20, N=2)         | p<0.0001****                                     | p<0.0001****                                     | p<0.0001****                                     | p=0.1207                                         | p=0.0087**                                       |
| CatCh /P10 (10:1) (n=20, N=2)          | p<0.0001****                                     | p<0.0001****                                     | p=0.0008***                                      | p=0.8620                                         | p=0.7180                                         |
| CatCh /CQ (10:1) (n=20, N=2)           | p=0.0065**                                       | p=0.0002***                                      | p<0.0001****                                     | p=0.0675                                         | p=0.0012**                                       |
|                                        | Syn-ChrimsonR/Lipofectamine<br>(1:1) (n=19, N=2) |
| Syn-ChrimsonR /ND12 (8:1) (n=20, N=2)  | p<0.0001****                                     | p<0.0001****                                     | p<0.0001****                                     | p<0.0001****                                     | p<0.0001****                                     |
| Syn-ChrimsonR /ND12 (10:1) (n=20, N=2) | p<0.0001****                                     | p<0.0001****                                     | p<0.0001****                                     | p<0.0001****                                     | p<0.0001****                                     |
| Syn-ChrimsonR /P10 (8:1) (n=20, N=2)   | p<0.0001****                                     | p<0.0001****                                     | p<0.0001****                                     | p<0.0001****                                     | p<0.0001****                                     |
| Syn-ChrimsonR /P10 (10:1) (n=20, N=2)  | p<0.0001****                                     | p<0.0001****                                     | p<0.0001****                                     | p<0.0001****                                     | p<0.0001****                                     |
| Syn-ChrimsonR /CQ (8:1) (n=13, N=2)    | p<0.0001****                                     | p<0.0001****                                     | p<0.0001****                                     | p<0.0001****                                     | p<0.0001****                                     |
| Syn-ChrimsonR /CQ (10:1) (n=12, N=2)   | p<0.0001****                                     | p<0.0001****                                     | p<0.0001****                                     | p<0.0001****                                     | p<0.0001****                                     |
|                                        | GFP/Lipofectamine (1:1) (n=20,<br>N=2)           |
| GFP/ND12 (5:1) (n=20, N=2)             | p<0.0001****                                     | p<0.0001****                                     | p<0.0001****                                     | p=0.1653                                         | p=0.0283*                                        |
| GFP/ND12 (8:1) (n=20, N=2)             | p<0.0001****                                     | p<0.0001****                                     | p<0.0001****                                     | p<0.0001****                                     | p<0.0001****                                     |
| GFP/ND12 (10:1) (n=20, N=2)            | p<0.0001****                                     | p<0.0001****                                     | p<0.0001****                                     | p=0.0019**                                       | p<0.0001****                                     |
| GFP/P10 (5:1) (n=20, N=2)              | p<0.0001****                                     | p<0.0001****                                     | p<0.0001****                                     | p=0.0103*                                        | p<0.0001****                                     |
| GFP/P10 (8:1) (n=20, N=2)              | p<0.0001****                                     | p<0.0001****                                     | p<0.0001****                                     | p<0.0001****                                     | p<0.0001****                                     |
| GFP/P10 (10:1) (n=20, N=2)             | p<0.0001****                                     | p<0.0001****                                     | p<0.0001****                                     | p<0.0001****                                     | p<0.0001****                                     |
| GFP/CQ (5:1) (n=20, N=2)               | p<0.0001****                                     | p<0.0001****                                     | p<0.0001****                                     | p=0.0007***                                      | p<0.0001****                                     |
| GFP/CQ (8:1) (n=20, N=2)               | p<0.0001****                                     | p<0.0001****                                     | p<0.0001****                                     | p<0.0001****                                     | p<0.0001****                                     |
| GFP/CQ (10:1) (n=20, N=2)              | p<0.0001****                                     | p<0.0001****                                     | p<0.0001****                                     | p=0.0155*                                        | p=0.0002***                                      |

**Supplementary Table S1.** p-values of 21-28 DIV neurons treated with nioplexes compared with lipofectamine treated neurons in morphological analysis.

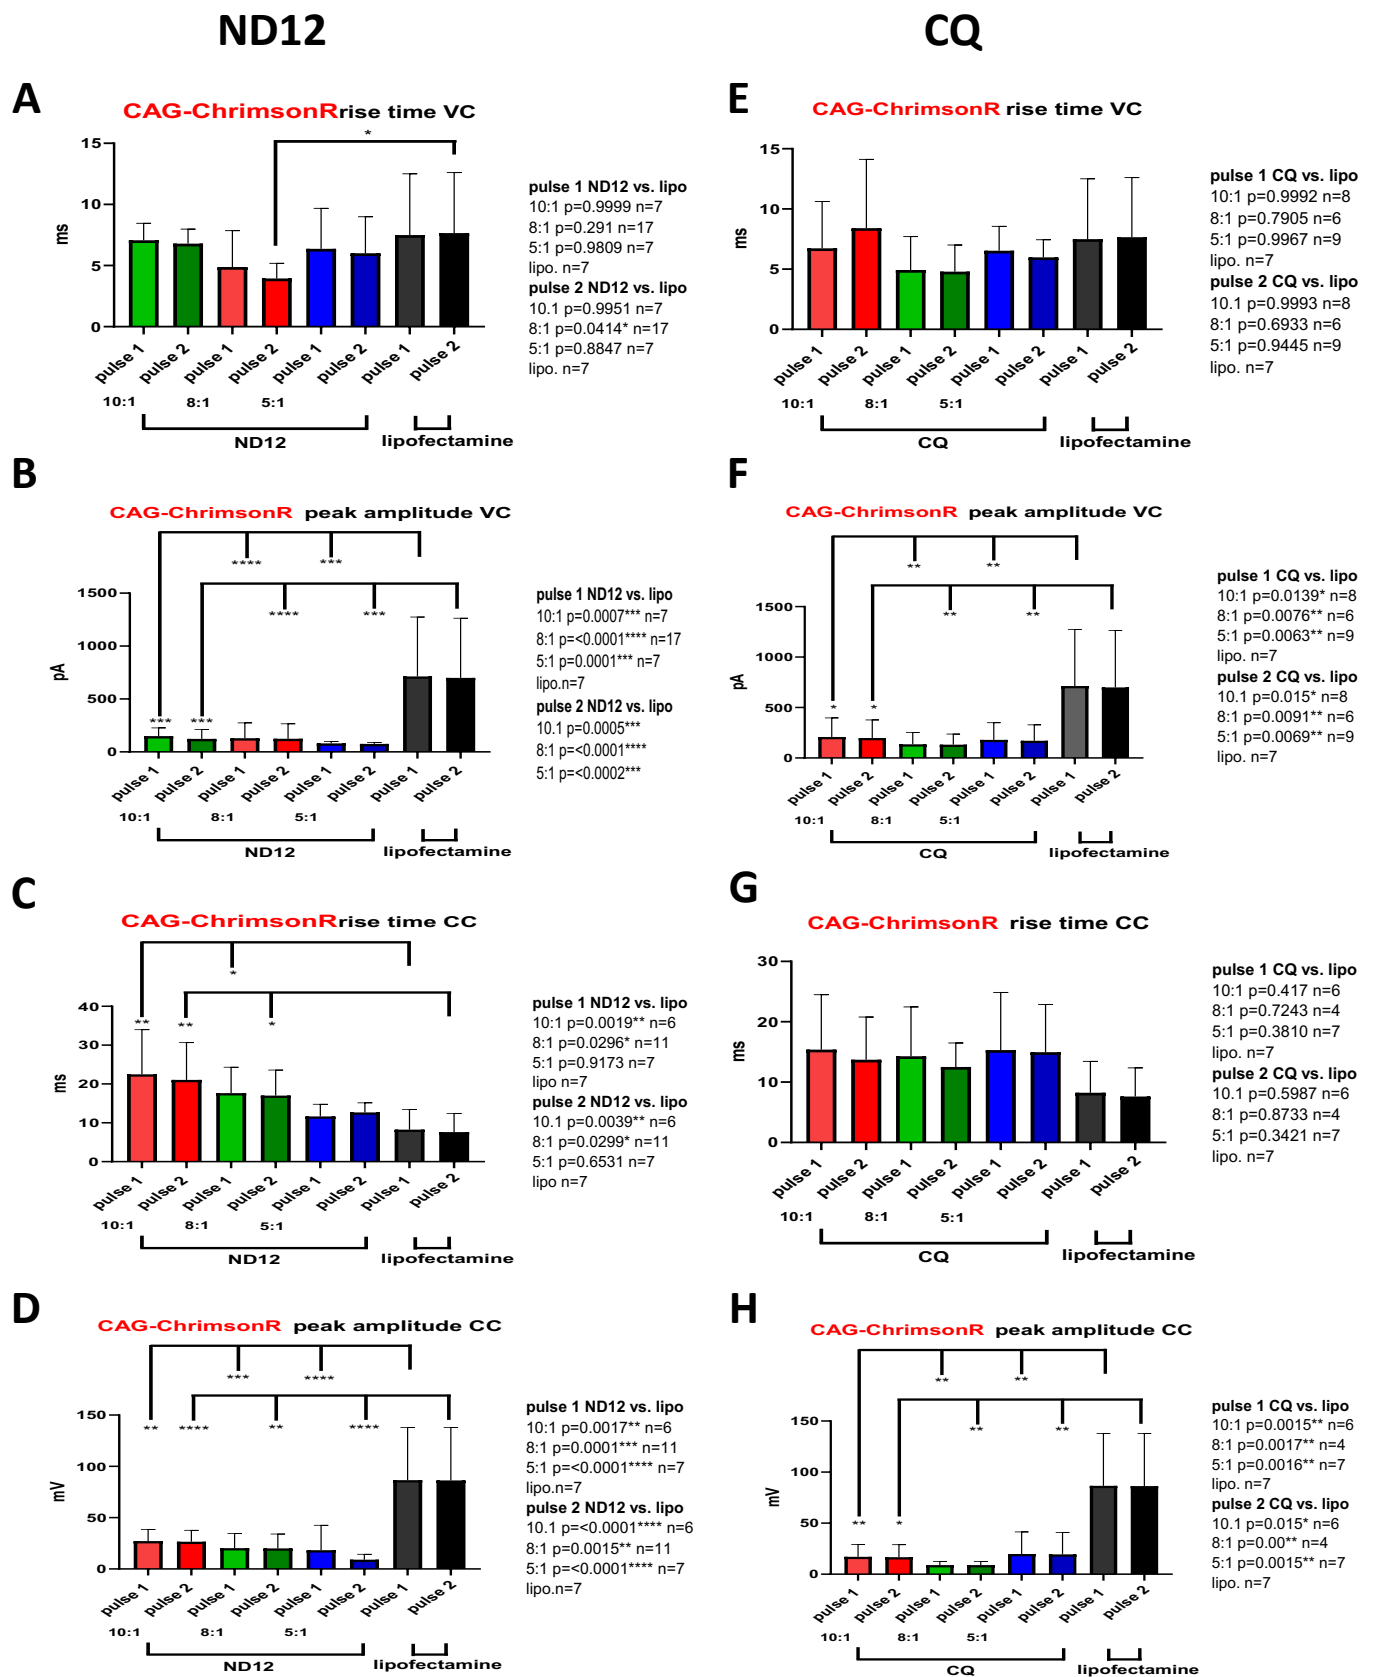

**Supplementary Figure S3. Additional electrophysiological changes produced by nioplexes with CAG-ChrimsonR in rat cortical neurons.** Photostimulation of rat cortical neuron DIV 28 expressing CAG-ChrimsonR transfected with niosomes or lipofectamine (1:1) with two pulses of 5 ms (590 nm) with a 1-second interspace. (A-D) Comparison between lipofectamine and ND12 niosomes at different ratios in rise time and peak amplitude electrophysiological parameters in each light pulse in VC and CC modes, showing reduced peak amplitudes in neurons treated with niosomes and, in some cases, increased rise times. (E-H) Comparison between lipofectamine and CQ niosomes at different ratios in rise time and peak amplitude electrophysiological parameters in each light pulse in VC and CC modes, showing reduced peak amplitudes in neurons treated with niosomes, but no differences in rise time (ordinary one-way ANOVA, \* $P<0.05$ , \*\* $P<0.01$ , \*\*\* $P<0.001$ , \*\*\*\* $P<0.0001$ ). Graphs bars are expressed as mean  $\pm$  SD.

ND12

A

Syn-ChrimsonR rise time VC

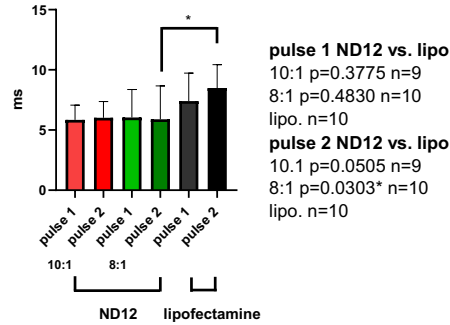

B

Syn-ChrimsonR peak amplitude VC

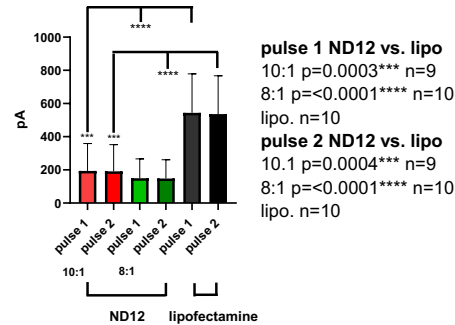

C

Syn-ChrimsonR rise time CC

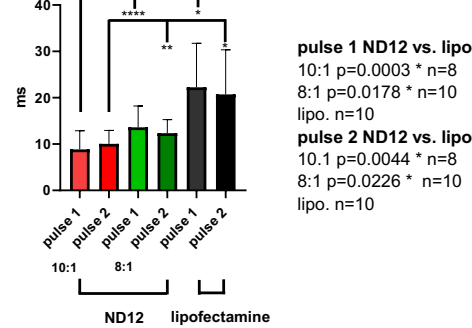

D

Syn-ChrimsonR peak amplitude CC

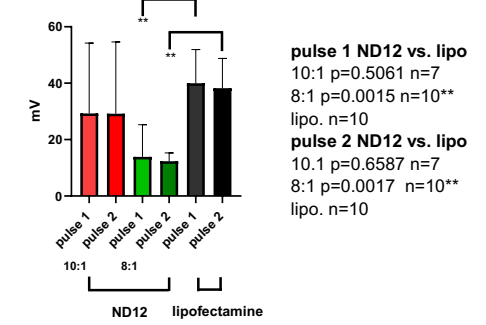

P10

F

Syn-ChrimsonR rise time VC

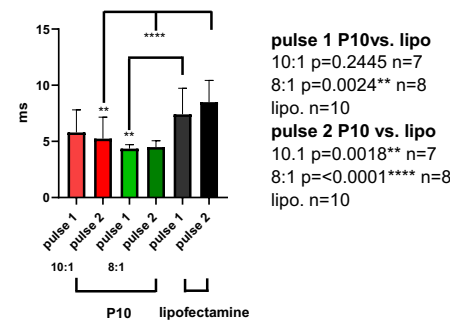

G

Syn-ChrimsonR peak amplitude VC

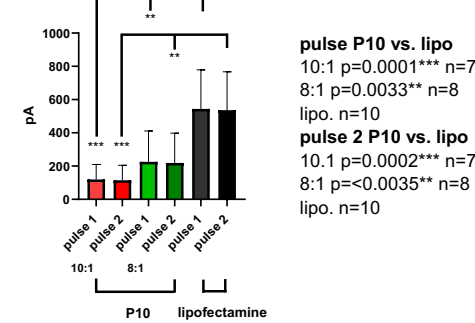

H

Syn-ChrimsonR rise time CC

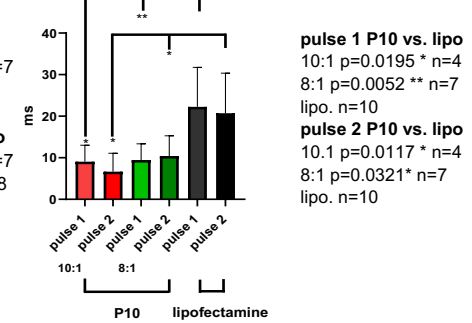

I

Syn-ChrimsonR peak amplitude CC

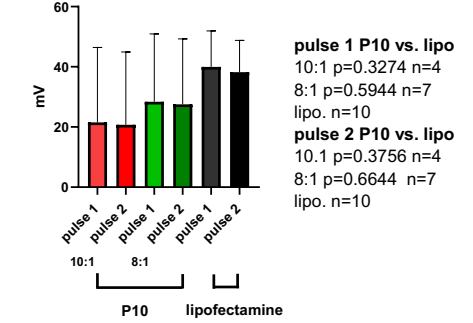

CQ

J

Syn-ChrimsonR rise time VC

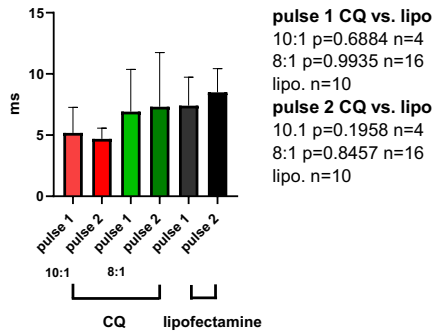

K

Syn-ChrimsonR peak amplitude VC

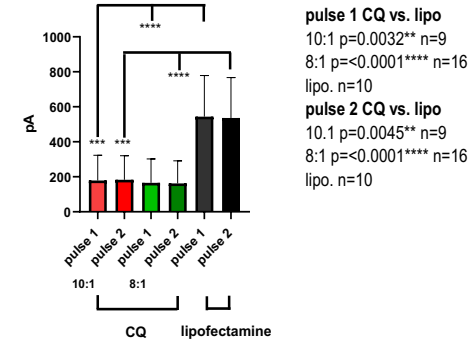

L

Syn-ChrimsonR rise time CC

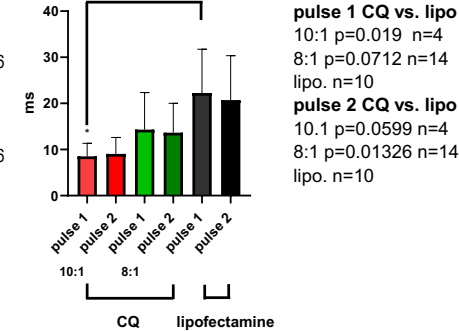

M

Syn-ChrimsonR peak amplitude CC

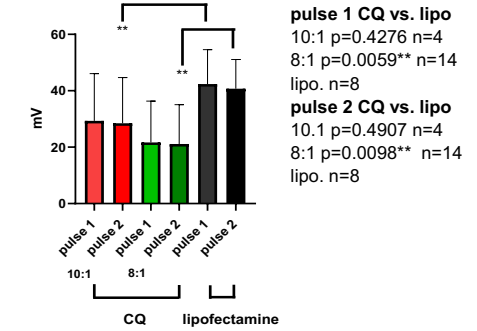

**Supplementary Figure S4. Electrophysiological changes produced by nioplexes with Syn-ChrimsonR in rat cortical neurons.** Photostimulation of rat cortical neuron DIV 28 expressing Syn-ChrimsonR transfected with niosomes or lipofectamine (1:1) with two pulses of 5 ms (590 nm) with a 1-second interspace. (A-D) Comparison between lipofectamine and ND12, niosomes (F-I) lipofectamine and P10 niosomes, and (J-M) lipofectamine and CQ niosomes at different ratios in rise time and peak amplitude electrophysiological parameters in each light pulse in VC and CC modes, showing reduced peak amplitudes in neurons treated with niosomes (although not in all cases, as it happens in CC peak amplitude with P10 niosomes) and, in some cases, reduced rise times (ordinary one-way ANOVA,  $*P<0.05$ ,  $**P<0.01$ ,  $***P<0.001$ ,  $****P<0.0001$ ). Graphs bars are expressed as mean  $\pm$  SD.

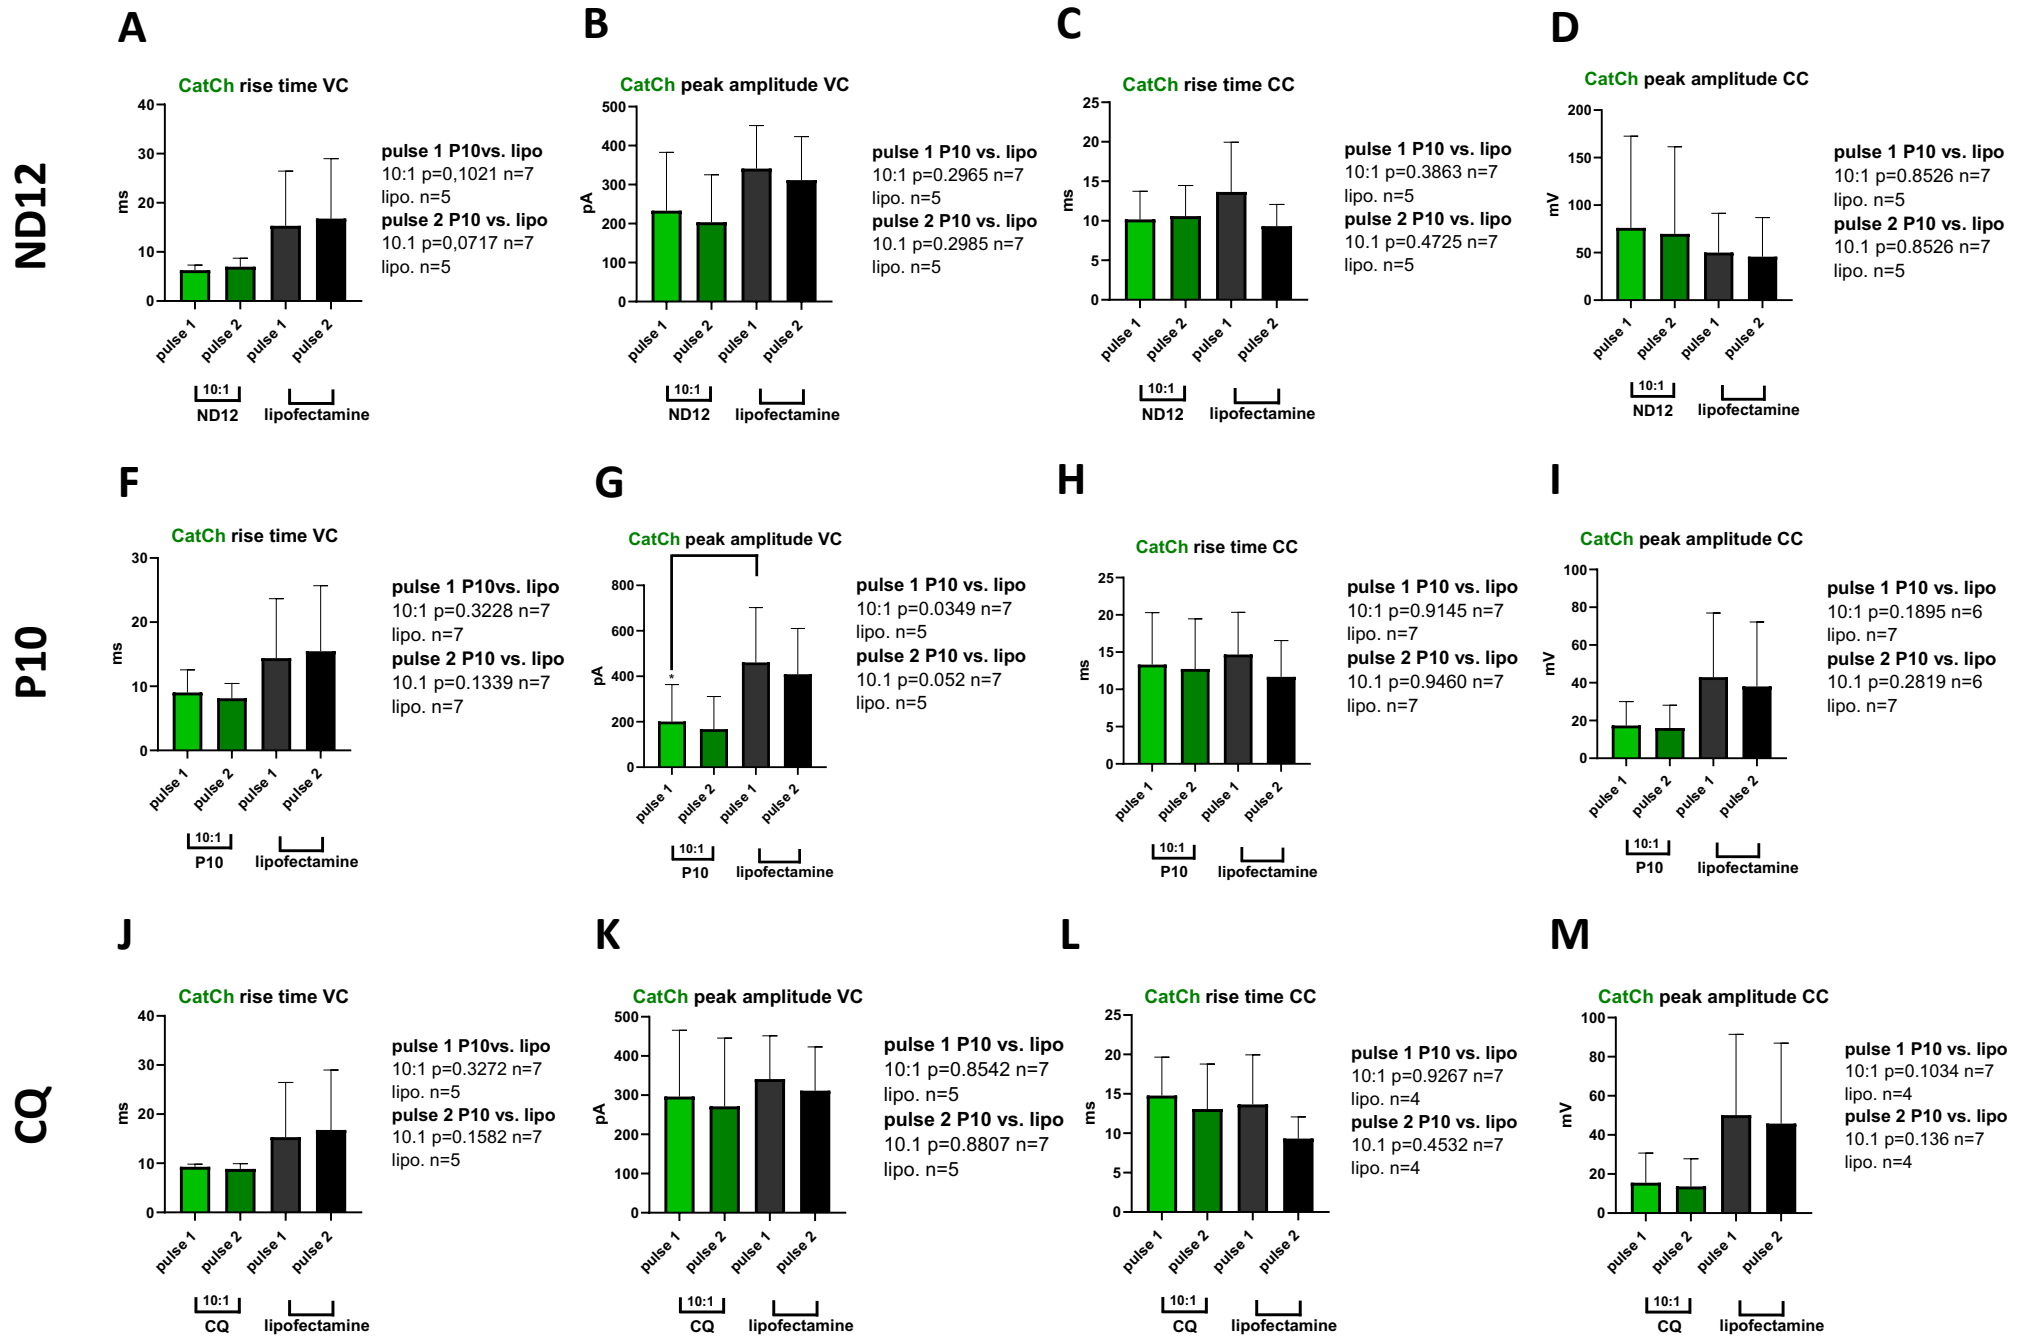

**Supplementary Figure S5. Electrophysiological changes produced by nioplexes with CatCh in rat cortical neurons.** Photostimulation of rat cortical neuron DIV 21-28 expressing CatCh transfected with niosomes or lipofectamine (1:1) with two pulses of 5 ms (590 nm) with a 1-second interspace. (A-D) Comparison between lipofectamine and ND12, niosomes (F-I) lipofectamine and P10 niosomes, and (J-M) lipofectamine and CQ niosomes at different ratios in rise time and peak amplitude electrophysiological parameters in each light pulse in VC and CC modes, showing no statistical difference in any parameter, except in VC peak amplitude in P10 niosomes (ordinary one-way ANOVA,  $*P<0.05$ ,  $**P<0.01$ ,  $***P<0.001$ ,  $****P<0.0001$ ). Graphs bars are expressed as mean  $\pm$  SD.

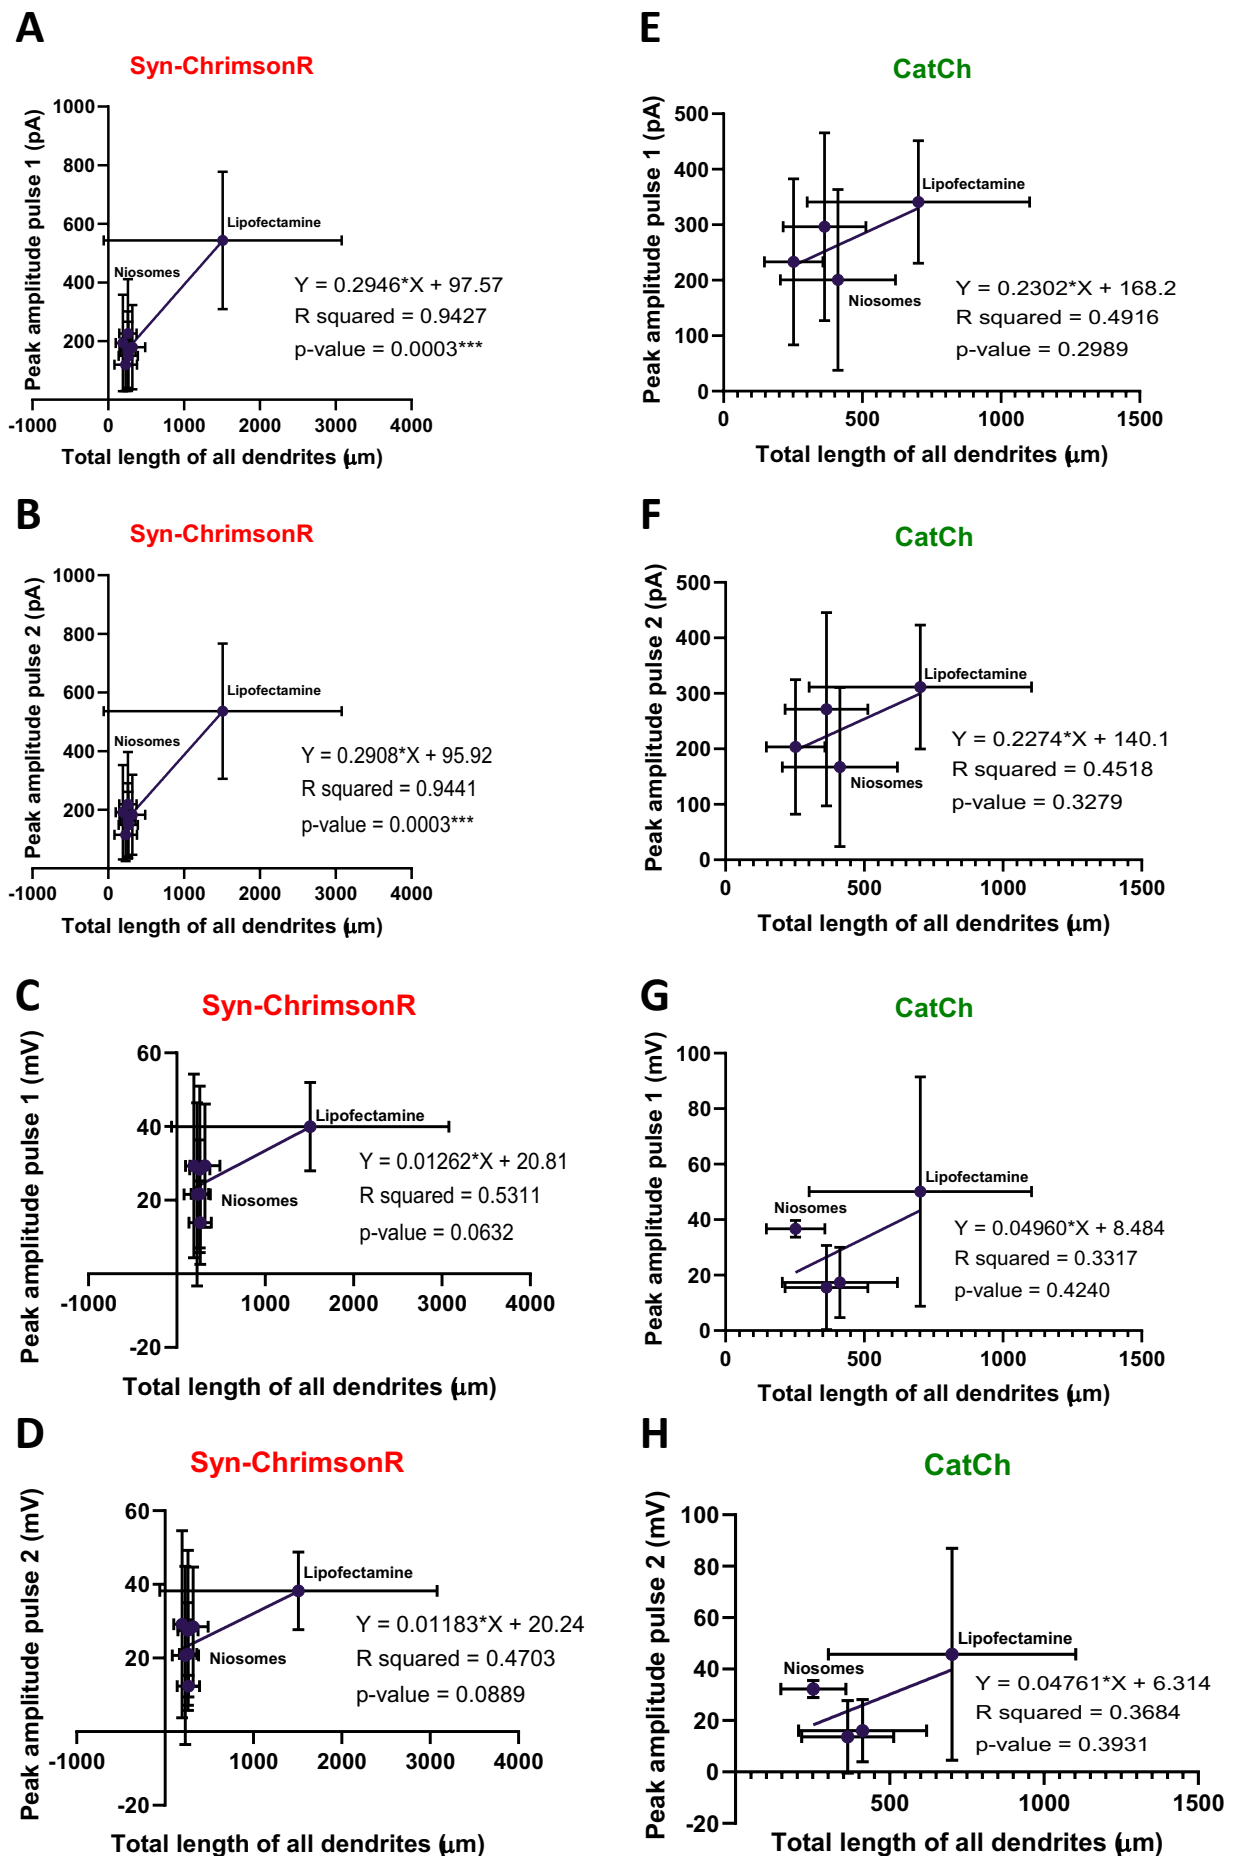

**Supplementary Figure S6. Morphological and electrophysiological correlations with Syn-ChrimsonR and CatCh plasmids.** (A-D) Dispersion graphs correlating total length of all dendrites morphological parameter with peak amplitude electrophysiological parameters in Syn-ChrimsonR expressing neurons, existing positive correlation and statistical significance with VC recordings in pulses 1 (A) and 2 (B), but not in CC recordings in pulses 1 (C) and 2 (D). (E-H) Dispersion graphs correlating total length of all dendrites morphological parameter with peak amplitude electrophysiological parameters in CatCh expressing neurons, with weak positive correlation and no statistical significance in both VC (E-F) and CC (G-H) recordings (simple linear regression, \*\*\* $P < 0.001$ ). Dots represent mean, horizontal graphs morphological (X axis) SD and vertical graphs electrophysiological (Y axis) SD.

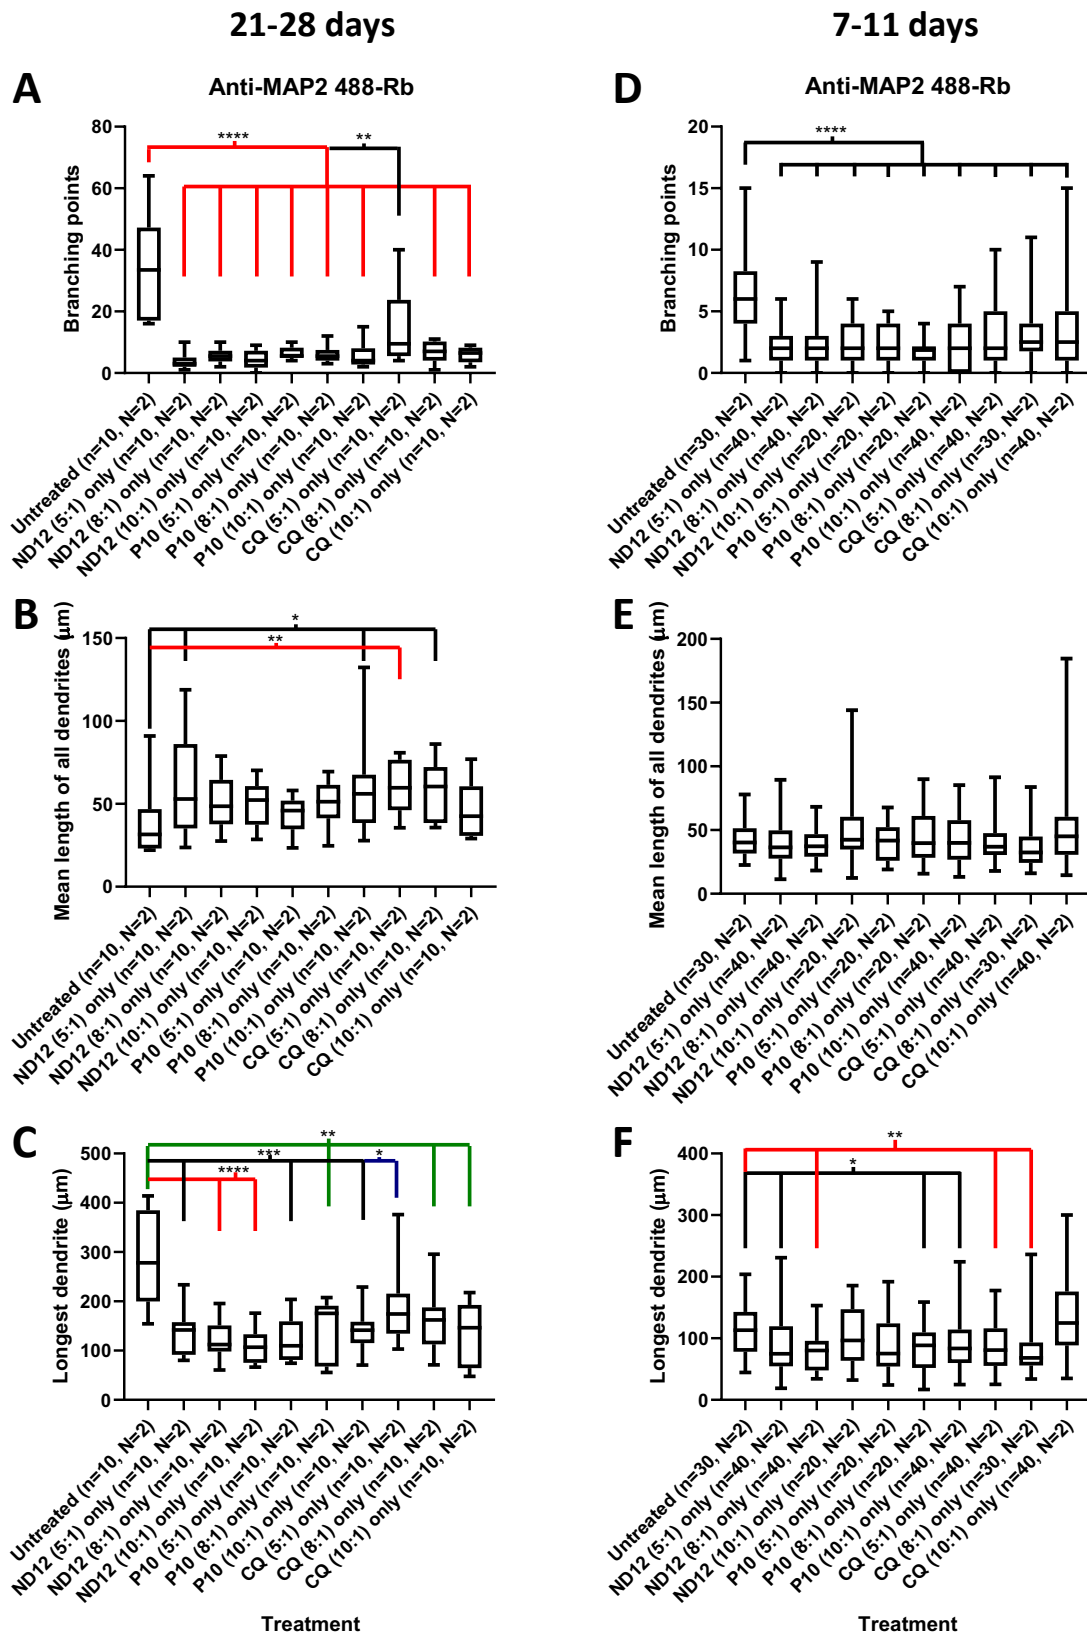

**Supplementary Figure S7. Additional morphological changes induced by niosomes alone in both 21-28 DIV and 7-11 DIV rat cortical neurons.** Both 21-28 DIV and 7-11 DIV rat cortical neurons treated with only niosomes showed several morphological alterations in their branching points (Mann-Whitney test, \* $P < 0.05$ , \*\* $P < 0.01$ , \*\*\* $P < 0.001$ , \*\*\*\* $P < 0.0001$ ,  $n$  = number of cells,  $N$  = number of cultures).



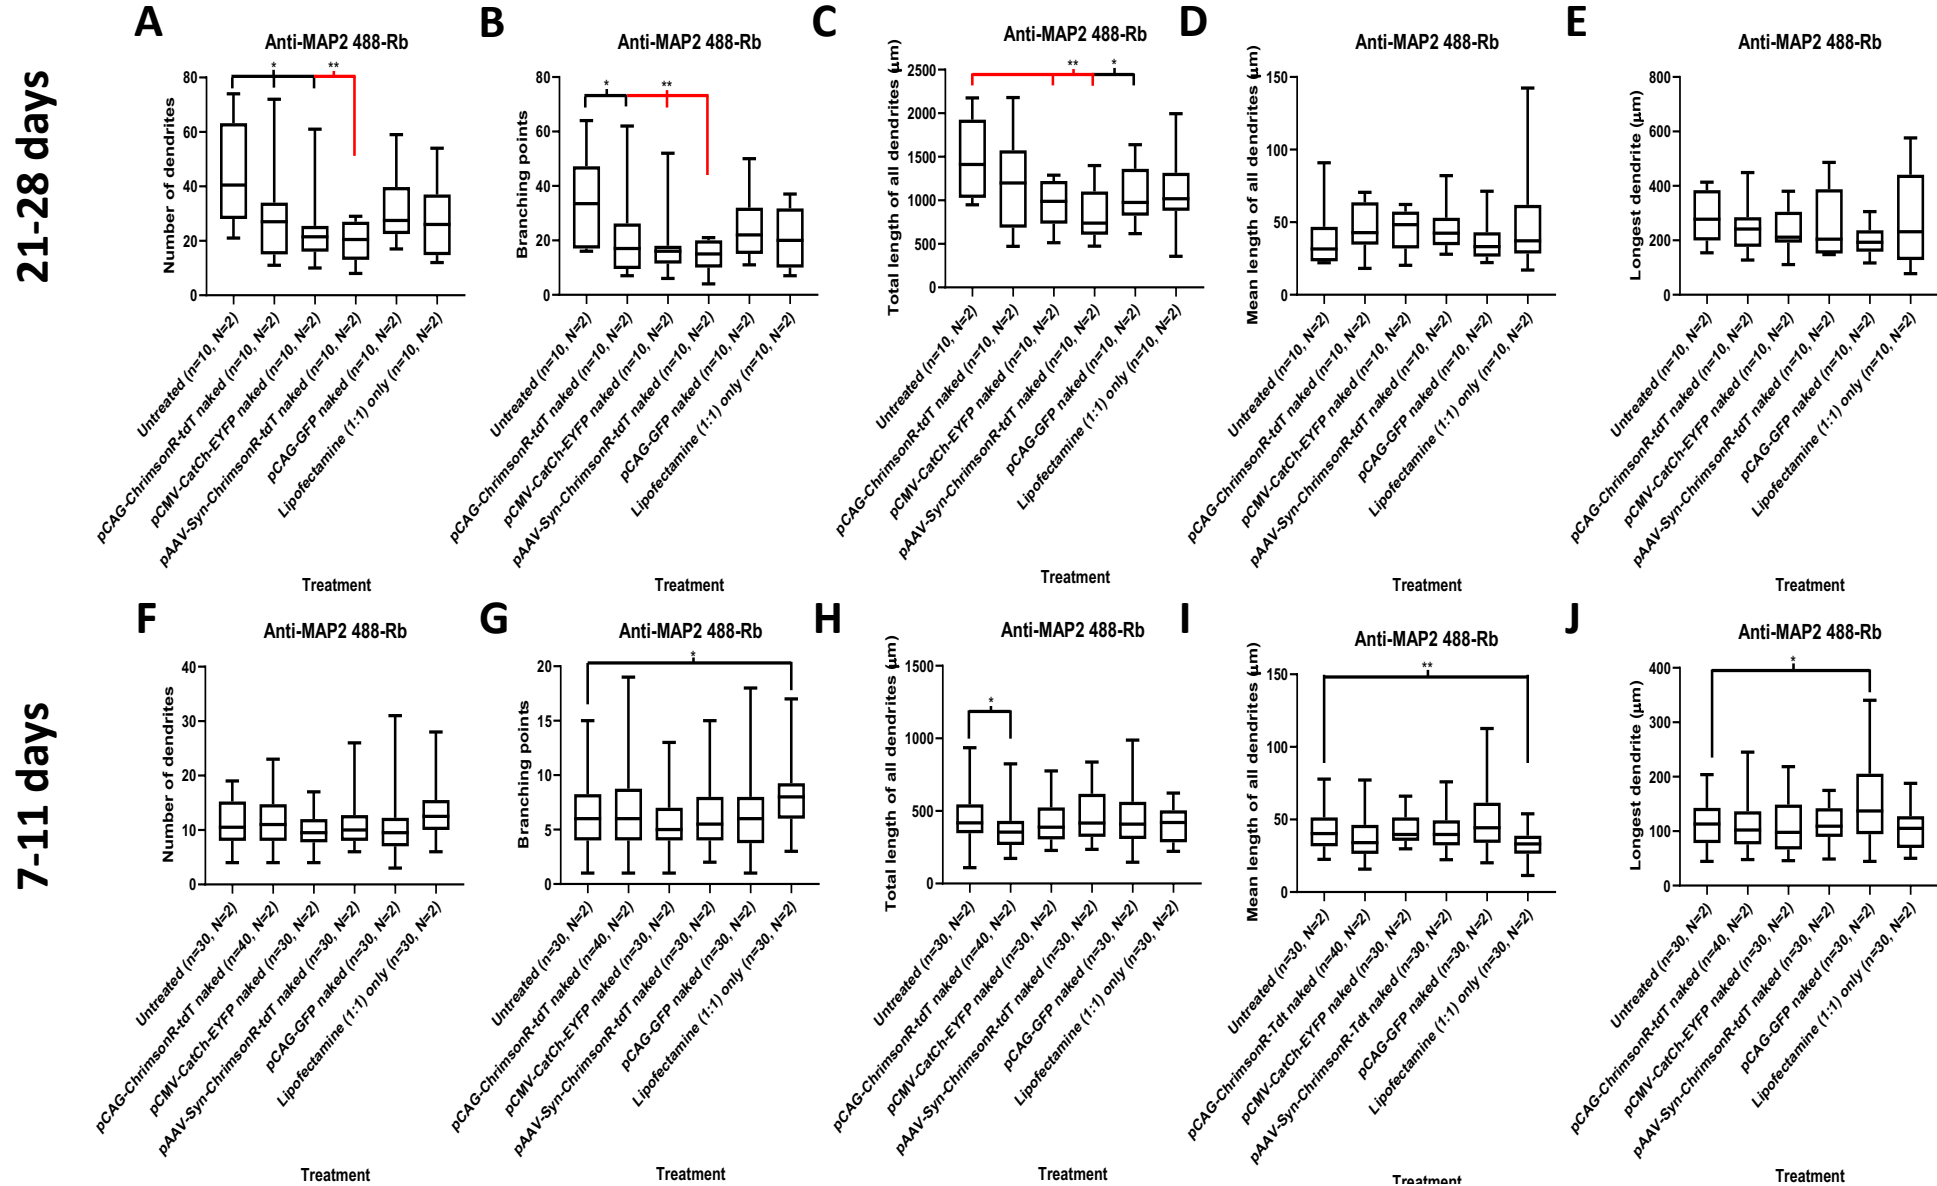

**Supplementary Figure S8. Morphological parameters in neurons treated with naked plasmids and only lipofectamine in both 21-28 DIV and 7-11 DIV rat cortical neurons.** 21-28 DIV rat cortical neurons treated with naked plasmids showed, depending on the plasmid used, some reductions in the morphological parameters number of dendrites (A), branching points (B), and total length of all dendrites (C), while the morphological parameters mean length of all dendrites (D) and longest dendrite (E) remained unaffected. On the other hand, 7-11 DIV neurons showed no statistical significance among treatments in number of dendrites (F), but they did in some cases in branching points (G), total length of all dendrites (H), mean length of all dendrites (I), and longest dendrite (J) (Mann-Whitney test, \* $P < 0.05$ , \*\* $P < 0.01$ ,  $n$  = number of cells,  $N$  = number of cultures).

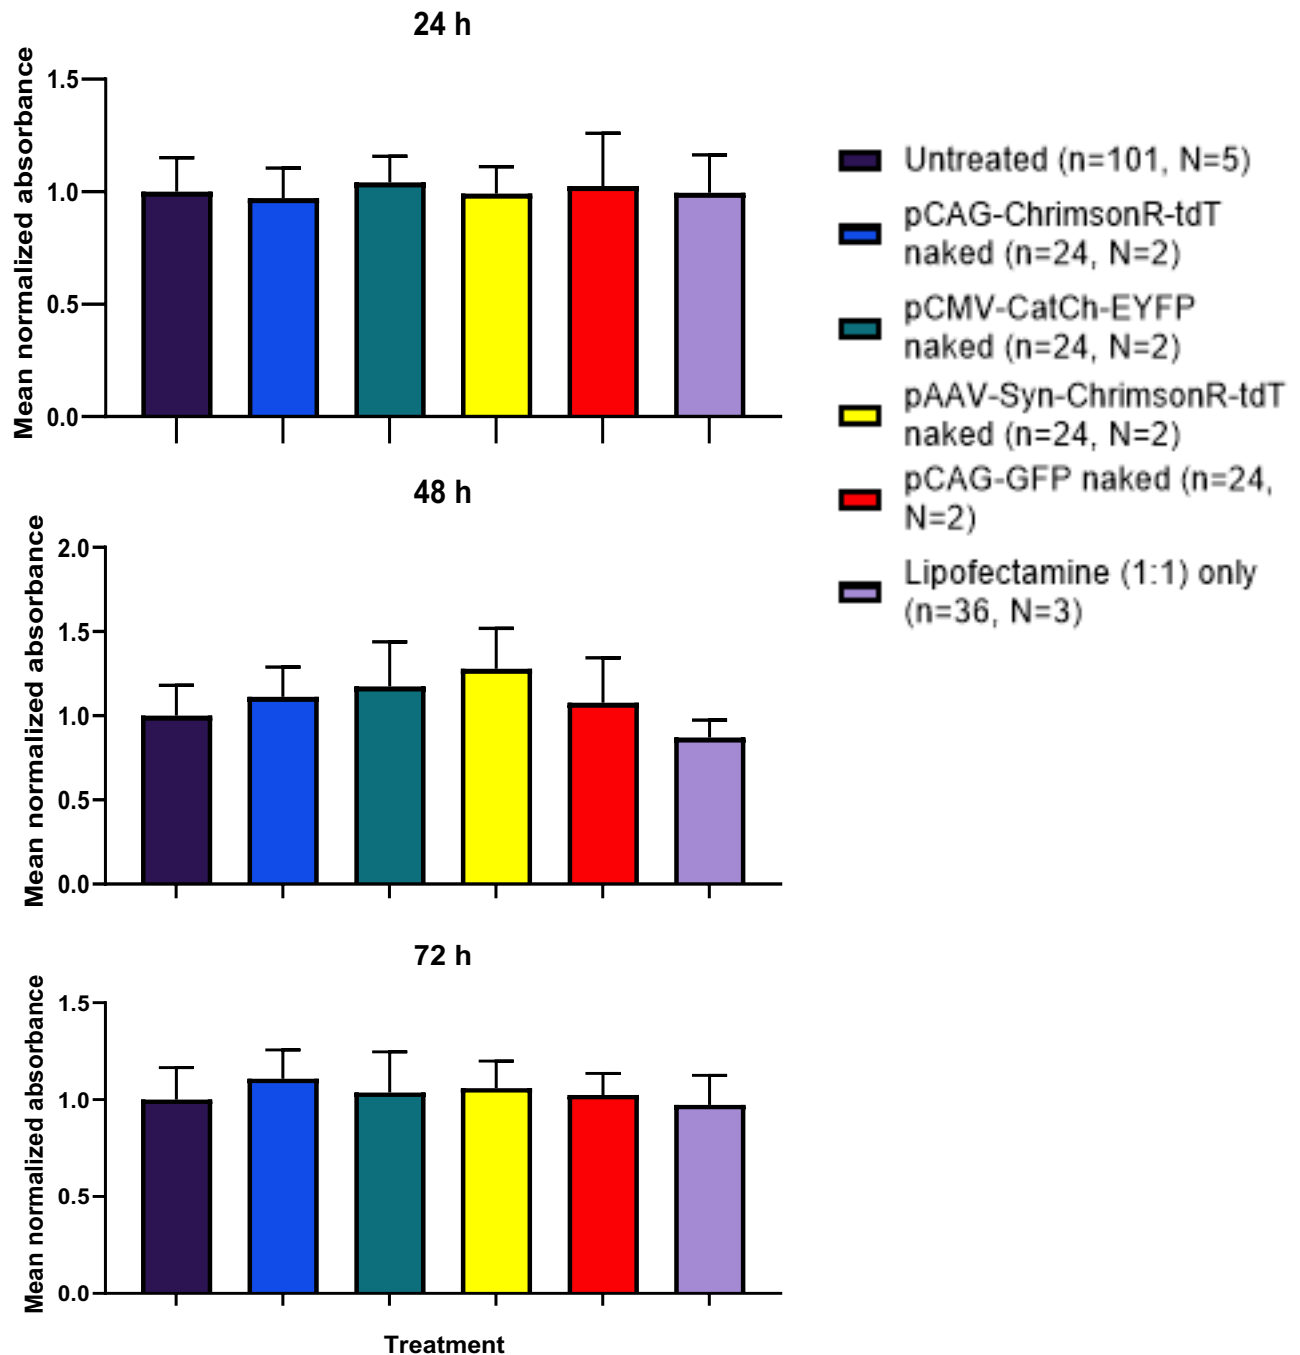

**Supplementary Figure S9. Cell viability with naked plasmids and lipofectamine is not affected in 21-28 DIV cortical neurons.** MTT assays performed at 24, 48 and 72 h in 21-28 DIV rat cortical neurons showed no reduction in cell viability with naked plasmids nor lipofectamine only compared with untreated neurons. (Multiple t-tests, \* $P < 0.05$ , \*\*\* $P < 0.001$ , \*\*\*\* $P < 0.0001$ , n = number of wells, N = number of cultures). Graph bars are expressed as mean  $\pm$  SD.

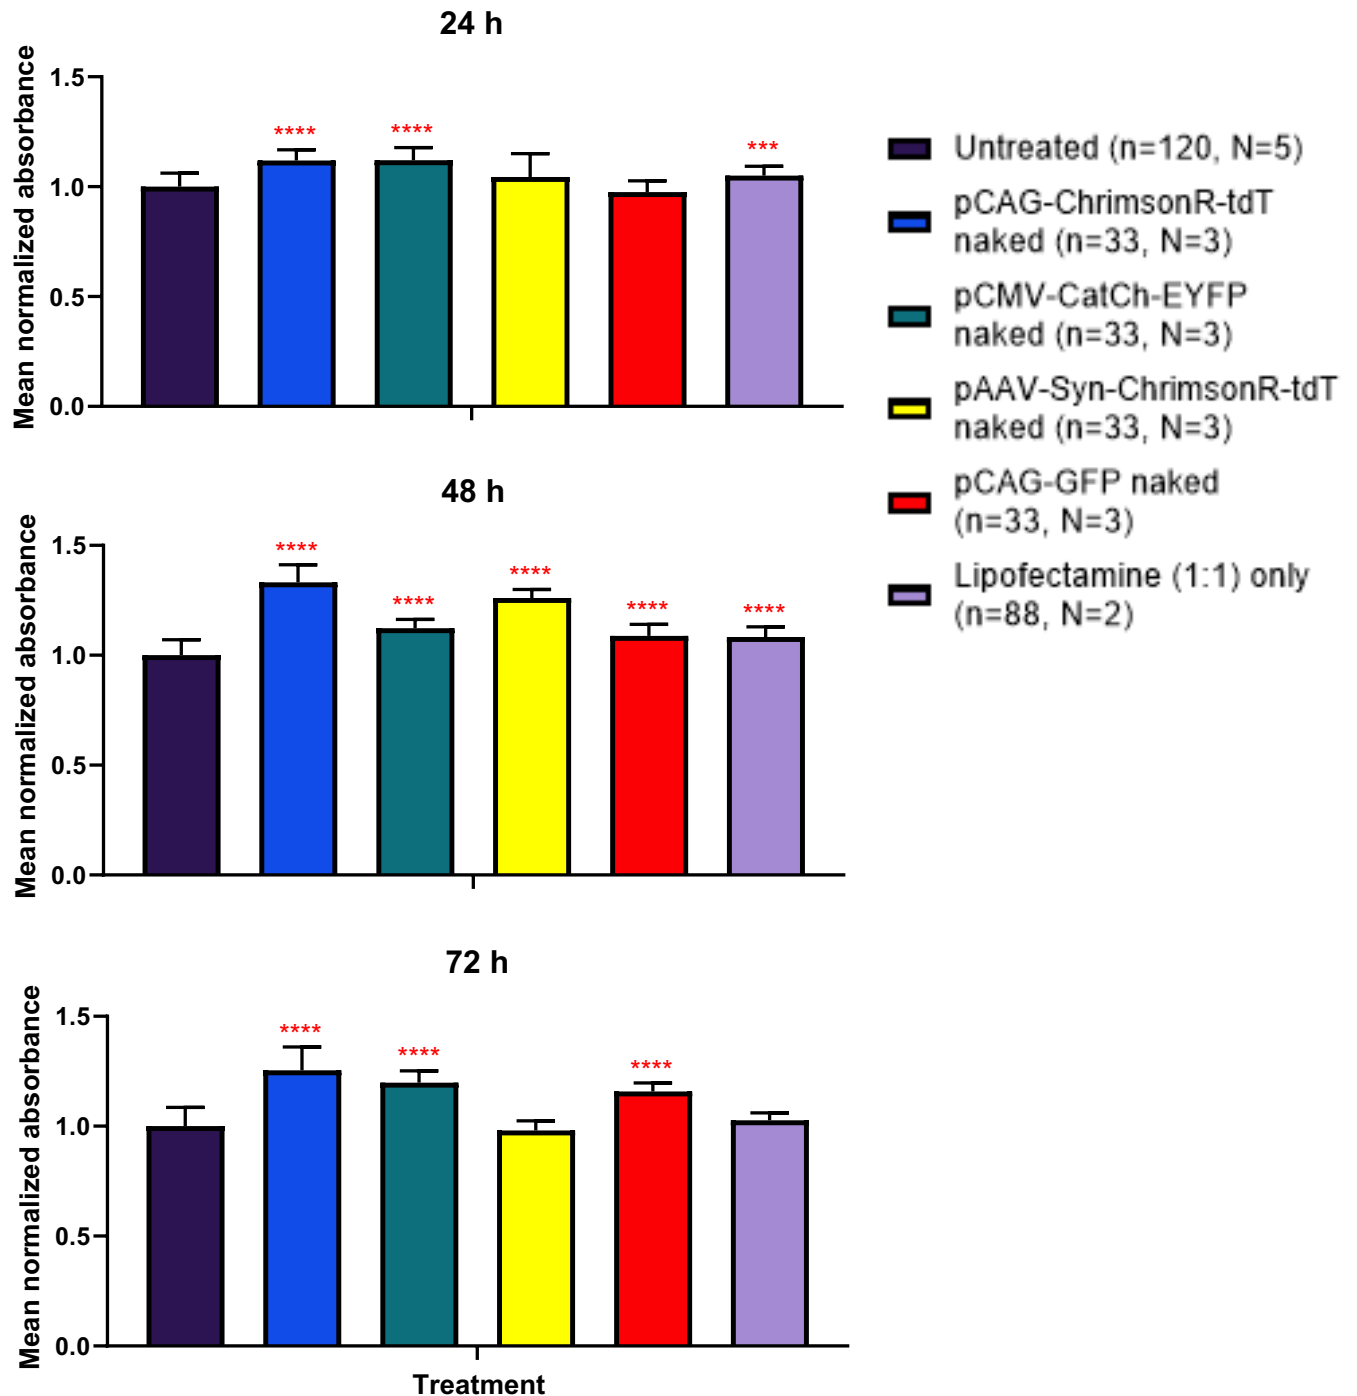

**Supplementary Figure S10. Cell viability with naked plasmids and lipofectamine is not affected in 7-11 DIV cortical neurons.** MTT assays performed at 24, 48 and 72 h in 7-11 DIV rat cortical neurons showed no reduction in cell viability with naked plasmids nor lipofectamine only compared with untreated neurons. (Multiple t-tests,  $*P<0.05$ ,  $***P<0.001$ ,  $****P<0.0001$ , n = number of wells, N = number of cultures). Red p-values mean that there is statistical difference with groups with higher mean values than the untreated groups. Graph bars are expressed as mean  $\pm$  SD.

| Anti-MAP2 488-Rb<br>21-28 days neurons  | Number of<br>dendrites   | Branching<br>points      | Total length<br>of all<br>dendrites | Mean<br>length of all<br>dendrites | Longest<br>dendrite      |
|-----------------------------------------|--------------------------|--------------------------|-------------------------------------|------------------------------------|--------------------------|
|                                         | Untreated<br>(n=10, N=2) | Untreated<br>(n=10, N=2) | Untreated<br>(n=10, N=2)            | Untreated<br>(n=10, N=2)           | Untreated<br>(n=10, N=2) |
| ND12 (5:1) only (n=10, N=2)             | p<0.0001****             | p<0.0001****             | p<0.0001****                        | p=0.0355*                          | p=0.0002***              |
| ND12 (8:1) only (n=10, N=2)             | p<0.0001****             | p<0.0001****             | p<0.0001****                        | p=0.0753                           | p<0.0001****             |
| ND12 (10:1) only (n=10, N=2)            | p<0.0001****             | p<0.0001****             | p<0.0001****                        | p=0.0630                           | p<0.0001****             |
| P10 (5:1) only (n=10, N=2)              | p<0.0001****             | p<0.0001****             | p<0.0001****                        | p=0.1431                           | p=0.0001***              |
| P10 (8:1) only (n=10, N=2)              | p<0.0001****             | p<0.0001****             | p=0.0002***                         | p=0.0630                           | p=0.0029**               |
| P10 (10:1) only (n=10, N=2)             | p<0.0001****             | p<0.0001****             | p<0.0001****                        | p=0.0288*                          | p=0.0002***              |
| CQ (5:1) only (n=10, N=2)               | p=0.0042**               | p=0.0041**               | p=0.1051                            | p=0.0089**                         | p=0.0232*                |
| CQ (8:1) only (n=10, N=2)               | p<0.0001****             | p<0.0001****             | p=0.0003***                         | p=0.0147*                          | p=0.0039**               |
| CQ (10:1) only (n=10, N=2)              | p<0.0001****             | p<0.0001****             | p<0.0001****                        | p=0.1655                           | p=0.0011**               |
| CAG-ChrimsonR naked<br>(n=10, N=2)      | p=0.0498*                | p=0.0410*                | p=0.2799                            | p=0.2176                           | p=0.3527                 |
| CatCh naked (n=10, N=2)                 | p=0.0136*                | p=0.0081**               | p=0.0068**                          | p=0.1903                           | p=0.2475                 |
| Syn-ChrimsonR naked<br>(n=10, N=2)      | p=0.0014**               | p=0.0023**               | p=0.0039**                          | p=0.1279                           | p=0.3930                 |
| GFP naked (n=10, N=2)                   | p=0.1593                 | p=0.1175                 | p=0.0232*                           | p=0.7959                           | p=0.0524                 |
| Lipofectamine (1:1) only<br>(n=10, N=2) | p=0.0502                 | p=0.0658                 | p=0.1051                            | p=0.4359                           | p=0.5787                 |

**Supplementary Table S2.** p-values of 21-28 DIV neurons treated with only niosomes or naked plasmids compared with untreated neurons in morphological analysis.

| MTT<br>21-28 days neurons            | Untreated (n=101, N=5) |              |            |
|--------------------------------------|------------------------|--------------|------------|
|                                      | 24 h                   | 48 h         | 72h        |
| ND12 (5:1) only (n=24, N=2)          | p=0.6033               | p=0.9098     | p=0.9098   |
| ND12 (8:1) only (n=42, N=2)          | p<0.0001****           | p=0.1231     | p=0.4691   |
| ND12 (10:1) only (n=41, N=4)         | p<0.0001****           | p=0.0367*    | p=0.0251*  |
| P10 (5:1) only (n=24, N=2)           | p=0.9571               | p=0.1080     | p=0.7230   |
| P10 (8:1) only (n=43, N=4)           | p=0.0309*              | p=0.2647     | p=0.0022** |
| P10 (10:1) only (n=42, N=4)          | p=0.0383*              | p=0.0198*    | p=0.9059   |
| CQ (5:1) only (n=24, N=2)            | p=0.2889               | p=0.6243     | p=0.5354   |
| CQ (8:1) only (n=43, N=4)            | p=0.0001***            | p<0.0001**** | p=0.1055   |
| CQ (10:1) only (n=42, N=4)           | p<0.0001****           | p=0.0011**   | p=0.5538   |
| CAG-ChrimsonR naked (n=24, N=2)      | p=0.6213               | p=0.2783     | p=0.2783   |
| CatCh naked (n=24, N=2)              | p=0.7266               | p=0.0840     | p=0.7266   |
| Syn-ChrimsonR naked (n=24, N=2)      | p=0.8775               | p=0.0017**   | p=0.5912   |
| GFP naked (n=24, N=2)                | p=0.9125               | p=0.6969     | p=0.9125   |
| Lipofectamine (1:1) only (n=36, N=3) | p=0.9319               | p=0.0720     | p=0.8620   |

**Supplementary Table S3.** p-values of 21-28 DIV neurons treated with only niosomes or naked plasmids compared with untreated neurons in MTT assays.

| MTT Nioplexes<br>21-28 DIV neurons       |                          |                                           |                          |
|------------------------------------------|--------------------------|-------------------------------------------|--------------------------|
| 8:1 proportion                           |                          | 10:1 proportion                           |                          |
|                                          | Untreated<br>(n=29, N=2) |                                           | Untreated<br>(n=30, N=2) |
| CAG-ChrimsonR/ND12 (8:1)<br>(n=10, N=2)  | p=0.0070**               | CAG-ChrimsonR/ND12 (10:1)<br>(n=10, N=2)  | p<0.0001****             |
| CAG-ChrimsonR/P10 (8:1)<br>(n=10, N=2)   | p=0.9233                 | CAG-ChrimsonR/P10 (10:1)<br>(n=10, N=2)   | p=0.0129*                |
| CAG-ChrimsonR/CQ (8:1)<br>(n=10, N=2)    | p<0.0001****             | CAG-ChrimsonR/CQ (10:1)<br>(n=10, N=2)    | p=0.0002***              |
| CatCh /ND12 (8:1)<br>(n=12, N=2)         | p=0.0010**               | CatCh /ND12 (10:1)<br>(n=10, N=2)         | p=0.0002***              |
| CatCh /P10 (8:1)<br>(n=12, N=2)          | p=0.1561                 | CatCh /P10 (10:1)<br>(n=10, N=2)          | p=0.1531                 |
| CatCh /CQ (8:1)<br>(n=12, N=2)           | p<0.0001****             | CatCh /CQ (10:1)<br>(n=10, N=2)           | p=0.0002***              |
| Syn-ChrimsonR /ND12 (8:1)<br>(n=11, N=2) | p<0.0001****             | Syn-ChrimsonR /ND12 (10:1)<br>(n=10, N=2) | p=0.0010**               |
| Syn-ChrimsonR /P10 (8:1)<br>(n=11, N=2)  | p=0.1027                 | Syn-ChrimsonR /P10 (10:1)<br>(n=10, N=2)  | p=0.0002***              |
| Syn-ChrimsonR /CQ (8:1)<br>(n=11, N=2)   | p=0.0002***              | Syn-ChrimsonR /CQ (10:1)<br>(n=10, N=2)   | p<0.0001****             |
| GFP/ND12 (8:1)<br>(n=10, N=2)            | p=0.0204*                | GFP/ND12 (10:1)<br>(n=10, N=2)            | p=0.0017**               |
| GFP/P10 (8:1)<br>(n=10, N=2)             | p=0.1807                 | GFP/P10 (10:1)<br>(n=10, N=2)             | p=0.7845                 |
| GFP/CQ (8:1)<br>(n=10, N=2)              | p=0.0663                 | GFP/CQ (10:1)<br>(n=10, N=2)              | p<0.0001****             |

**Supplementary Table S4.** p-values of 21-28 DIV neurons treated with nioplexes compared with untreated neurons in MTT assays.

| Anti-MAP2 488-Rb<br>7-11 days neurons   | Number of<br>dendrites   | Branching<br>points      | Total length<br>of all<br>dendrites | Mean<br>length of all<br>dendrites | Longest<br>dendrite      |
|-----------------------------------------|--------------------------|--------------------------|-------------------------------------|------------------------------------|--------------------------|
|                                         | Untreated<br>(n=30, N=2) | Untreated<br>(n=30, N=2) | Untreated<br>(n=30, N=2)            | Untreated<br>(n=30, N=2)           | Untreated<br>(n=30, N=2) |
| ND12 (5:1) only (n=40,<br>N=2)          | p<0.0001****             | p<0.0001****             | p<0.0001****                        | p=0.6561                           | p=0.0210*                |
| ND12 (8:1) only (n=40,<br>N=2)          | p<0.0001****             | p<0.0001****             | p<0.0001****                        | p=0.2601                           | p=0.0013**               |
| ND12 (10:1) only (n=20,<br>N=2)         | p<0.0001****             | p<0.0001****             | p<0.0001****                        | p=0.2755                           | p=0.3678                 |
| P10 (5:1) only (n=20, N=2)              | p<0.0001****             | p<0.0001****             | p<0.0001****                        | p=0.8791                           | p=0.0697                 |
| P10 (8:1) only (n=20, N=2)              | p<0.0001****             | p<0.0001****             | p<0.0001****                        | p=0.9101                           | p=0.0481*                |
| P10 (10:1) only (n=40,<br>N=2)          | p<0.0001****             | p<0.0001****             | p<0.0001****                        | p=0.9084                           | p=0.0262*                |
| CQ (5:1) only (n=40, N=2)               | p<0.0001****             | p<0.0001****             | p<0.0001****                        | p=0.4238                           | p=0.0077**               |
| CQ (8:1) only (n=30, N=2)               | p<0.0001****             | p<0.0001****             | p<0.0001****                        | p=0.0627                           | p=0.0017**               |
| CQ (10:1) only (n=40, N=2)              | p=0.0001***              | p<0.0001****             | p<0.0001****                        | p=0.3053                           | p=0.1571                 |
| CAG-ChrimsonR naked<br>(n=40, N=2)      | p=0.8291                 | p=0.8611                 | p=0.0356*                           | p=0.1142                           | p=0.6182                 |
| CatCh naked (n=30, N=2)                 | p=0.2296                 | p=0.3330                 | p=0.4492                            | p=0.5204                           | p=0.6973                 |
| Syn-ChrimsonR naked<br>(n=30, N=2)      | p=0.8707                 | p=0.9853                 | p=0.9707                            | p=0.8172                           | p=0.9474                 |
| GFP naked (n=30, N=2)                   | p=0.3205                 | p=0.6766                 | p=0.7302                            | p=0.291                            | p=0.0199*                |
| Lipofectamine (1:1) only<br>(n=30, N=2) | p=0.1479                 | p=0.0122*                | p=0.4761                            | p=0.0054**                         | p=0.3659                 |

**Supplementary Table S5.** p-values of 7-11 DIV neurons treated with only niosomes or naked plasmids compared with untreated neurons in morphological analysis.

| MTT<br>7-11 DIV neurons              | Untreated (n=120, N=5) |              |              |
|--------------------------------------|------------------------|--------------|--------------|
|                                      | 24 h                   | 48 h         | 72h          |
| ND12 (5:1) only (n=32, N=4)          | p=0.009**              | p=0.0005***  | p=0.5887     |
| ND12 (8:1) only (n=33, N=4)          | p<0.0001****           | p=0.0001***  | p=0.0040**   |
| ND12 (10:1) only (n=32, N=4)         | p<0.0001****           | p<0.0001**** | p<0.0001**** |
| P10 (5:1) only (n=32, N=4)           | p=0.0002***            | p=0.0683     | p=0.5073     |
| P10 (8:1) only (n=33, N=4)           | p=0.0018**             | p<0.0001**** | p<0.0001**** |
| P10 (10:1) only (n=33, N=4)          | p<0.0001****           | p<0.0001**** | p<0.0001**** |
| CQ (5:1) only (n=33, N=4)            | p<0.0001****           | p<0.0001**** | p=0.4979     |
| CQ (8:1) only (n=33, N=4)            | p<0.0001****           | p<0.0001**** | p<0.0001**** |
| CQ (10:1) only (n=33, N=4)           | p<0.0001****           | p<0.0001**** | p<0.0001**** |
| CAG-ChrimsonR naked (n=33, N=4)      | p<0.0001****           | p<0.0001**** | p<0.0001**** |
| CatCh naked (n=33, N=4)              | p<0.0001****           | p<0.0001**** | p<0.0001**** |
| Syn-ChrimsonR naked (n=33, N=4)      | p=0.1510               | p<0.0001**** | p=0.4697     |
| GFP naked (n=33, N=4)                | p=0.2512               | p<0.0001**** | p<0.0001**** |
| Lipofectamine (1:1) only (n=88, N=2) | p=0.0004***            | p<0.0001**** | p=0.1440     |

**Supplementary Table S6.** p-values of 7-11 DIV neurons treated with only niosomes or naked plasmids compared with untreated neurons in MTT assays. Red p-values mean that there is statistical difference with groups with higher mean values than the untreated groups, while black p-values mean that there is statistical difference with groups with lower mean values than the untreated groups.



| Niosome | Size (nm)  | Zeta Potential (mV) | PDI       |
|---------|------------|---------------------|-----------|
| ND12    | 89 ±1.3    | -23± 0,3            | 0.21±0.08 |
| P10     | 123.5±12.5 | 37.0 ±7.6           | 0,35±0.07 |
| CQ      | 118.2±1.5  | 28.9±.7.8           | 0.13±0.02 |

**Supplementary Table S7.** Physicochemical characterization of niosome formulations in terms of size, zeta potential, and polydispersity index. Each value represents the mean ± SD of three measurements.
